# Supplementary material for: Tannins and Bacitracin Differentially Modulate Gut Microbiota of Broiler Chickens
Source: Hindawi journal article supplement (doi:10.1155/2018/1879168), 2018-01-01

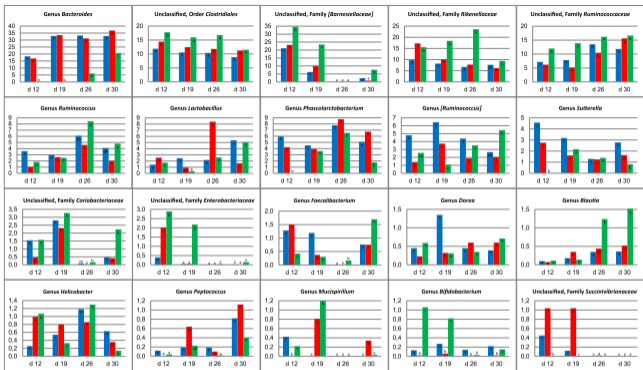

Supplement: f1 [file 1879168.f1.pdf]
